# Supplementary material for: Isolation, Purification, Characterization, and Immunomodulatory Activity Analysis of α-Glucans from Spirulina platensis
Source: PubMed Central journal article supplement — ACS Omega. 2021 Aug 12;6(33):21384–94. doi: 10.1021/acsomega.1c02175 (PMC8387993; doi:10.1021/acsomega.1c02175), 2021-08-12
Supplement: ao1c02175_si_001.pdf [file ao1c02175_si_001.pdf]

# Isolation, purification, characterization and immunomodulating activity analysis of $\alpha$ -glucans from *Spirulina platensis*

Jian Li<sup>a, b</sup>, Yaqi Zhang<sup>a</sup>, Shen Yang<sup>a, b</sup>, Zhenhua Lu<sup>a, b</sup>, Guiling Li<sup>a, b</sup>, Jingwen Liu<sup>a, b</sup>, Bo Zhou<sup>c</sup>, Daren Wu<sup>a, b, \*</sup>, Li Wang<sup>a, \*</sup>

<sup>a</sup> College of Food and Biological Engineering, Jimei University, Xiamen 361021, China

<sup>b</sup> Fujian Provincial Engineering Technology Research Center of Marine Functional Food, Xiamen 361021, China

<sup>c</sup> Department of Microbiology, College of Life Sciences, Shandong Agricultural University, Tai'an 271018, China

\* Corresponding author:

**Daren Wu, Ph.D.**

**Associate Professor**, College of Food and Biological Engineering, Jimei University

Address: No.43, Yindou Rd., Xiamen city, Fujian Province, 361021, China

E-mail: [darrenwu20@163.com](mailto:darrenwu20@163.com)

**Li Wang, Ph.D.**

**Professor**, College of Food and Biological Engineering, Jimei University

Address: No.43, Yindou Rd., Xiamen city, Fujian Province, 361021, China

E-mail: [wanglimerry@jmu.edu.cn](mailto:wanglimerry@jmu.edu.cn)

# Supporting Information

(A)

PSP-2 1HNMR

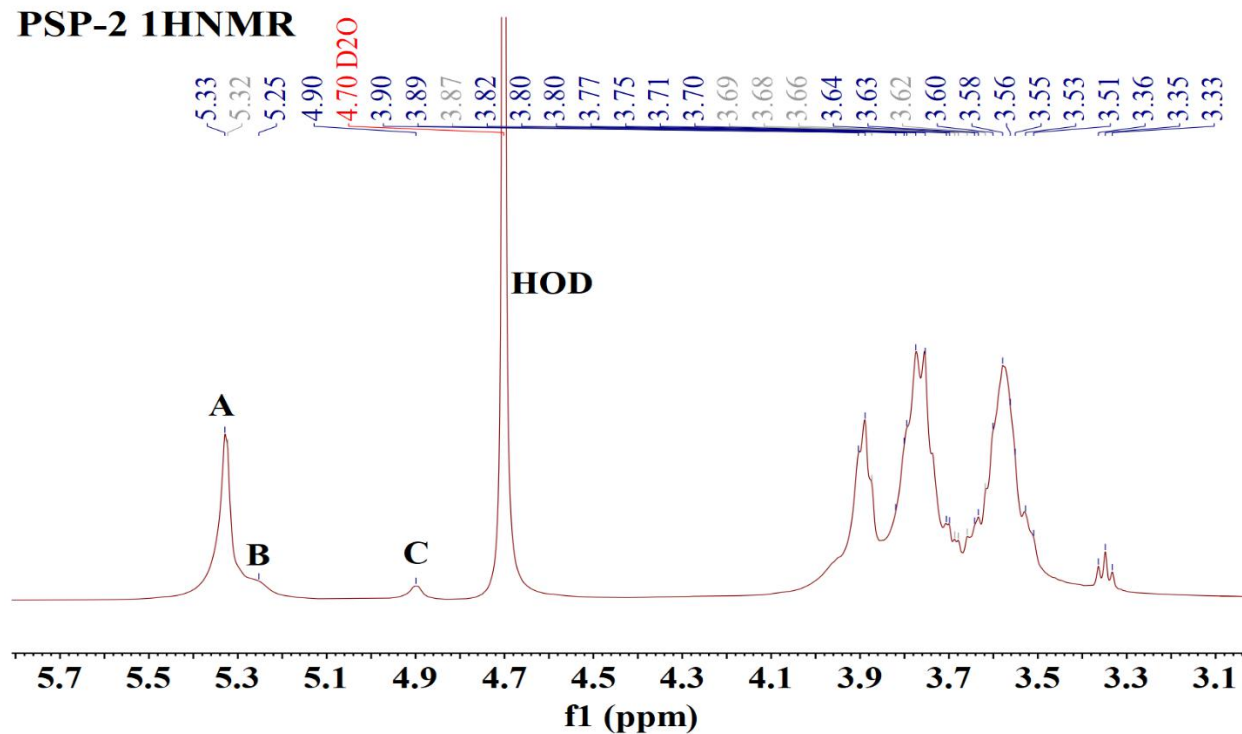

(B)

PSP-2 13CNMR

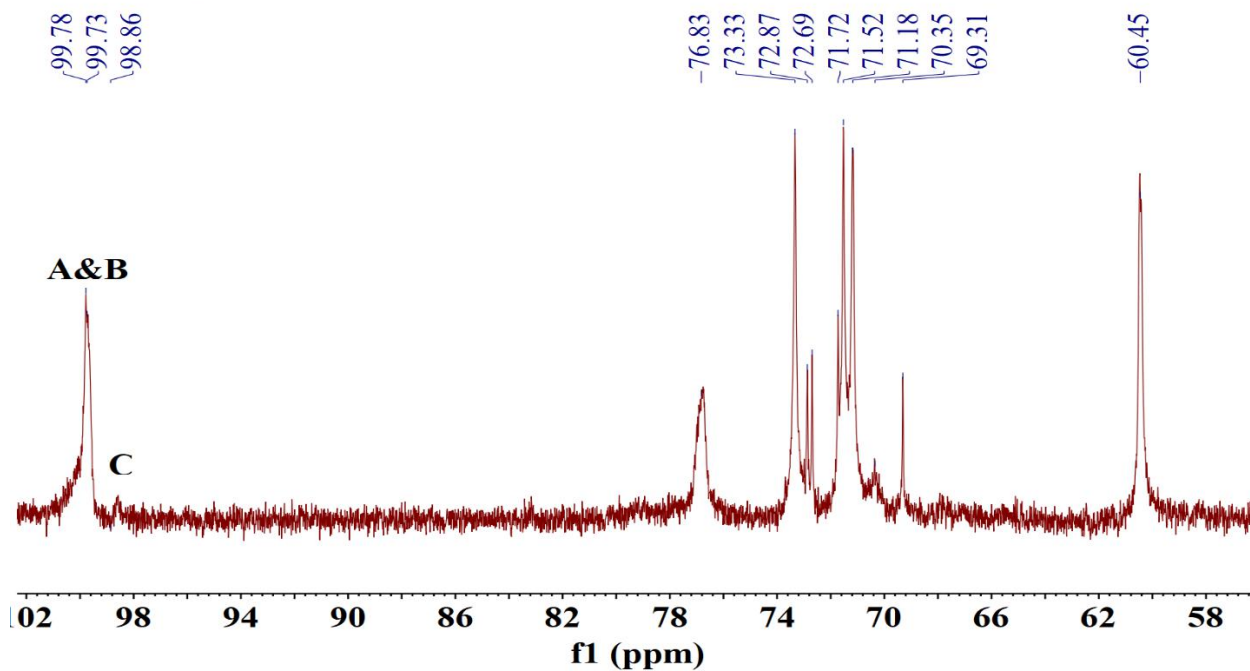

(C)

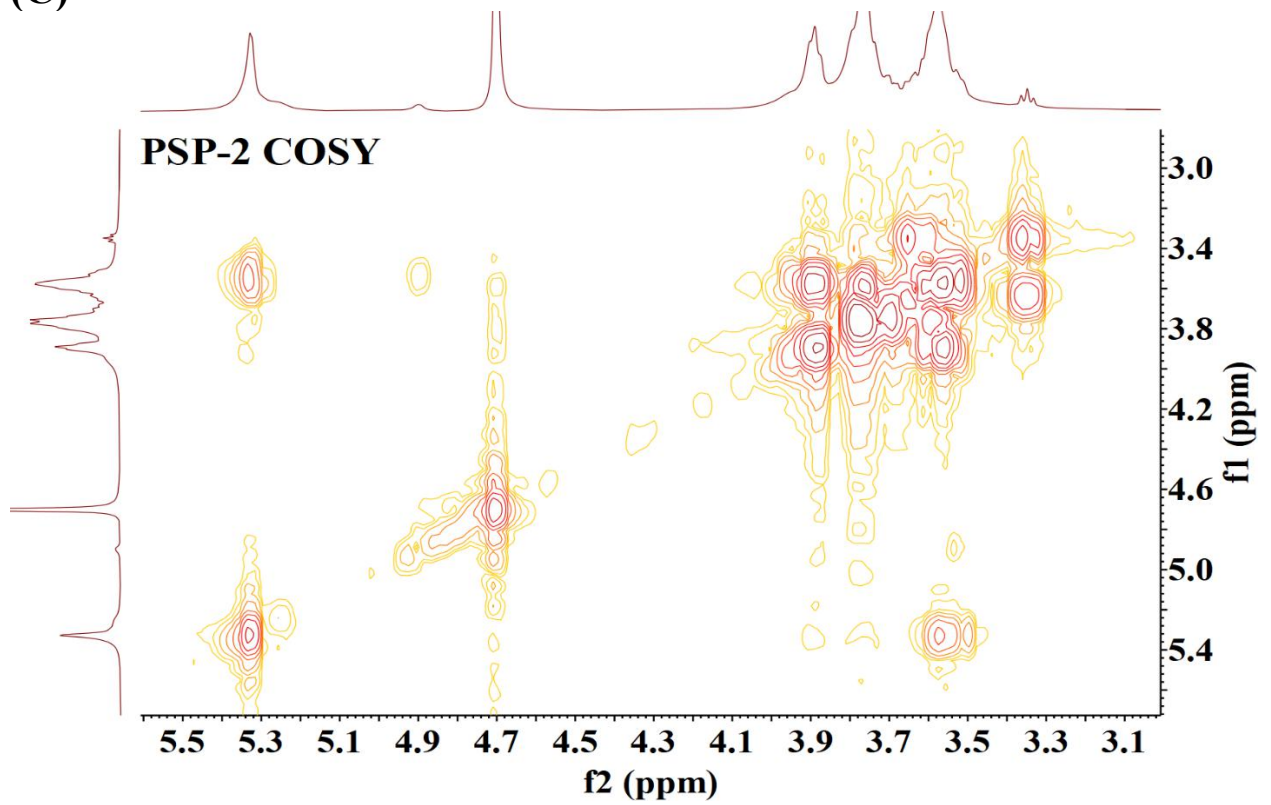

(D)

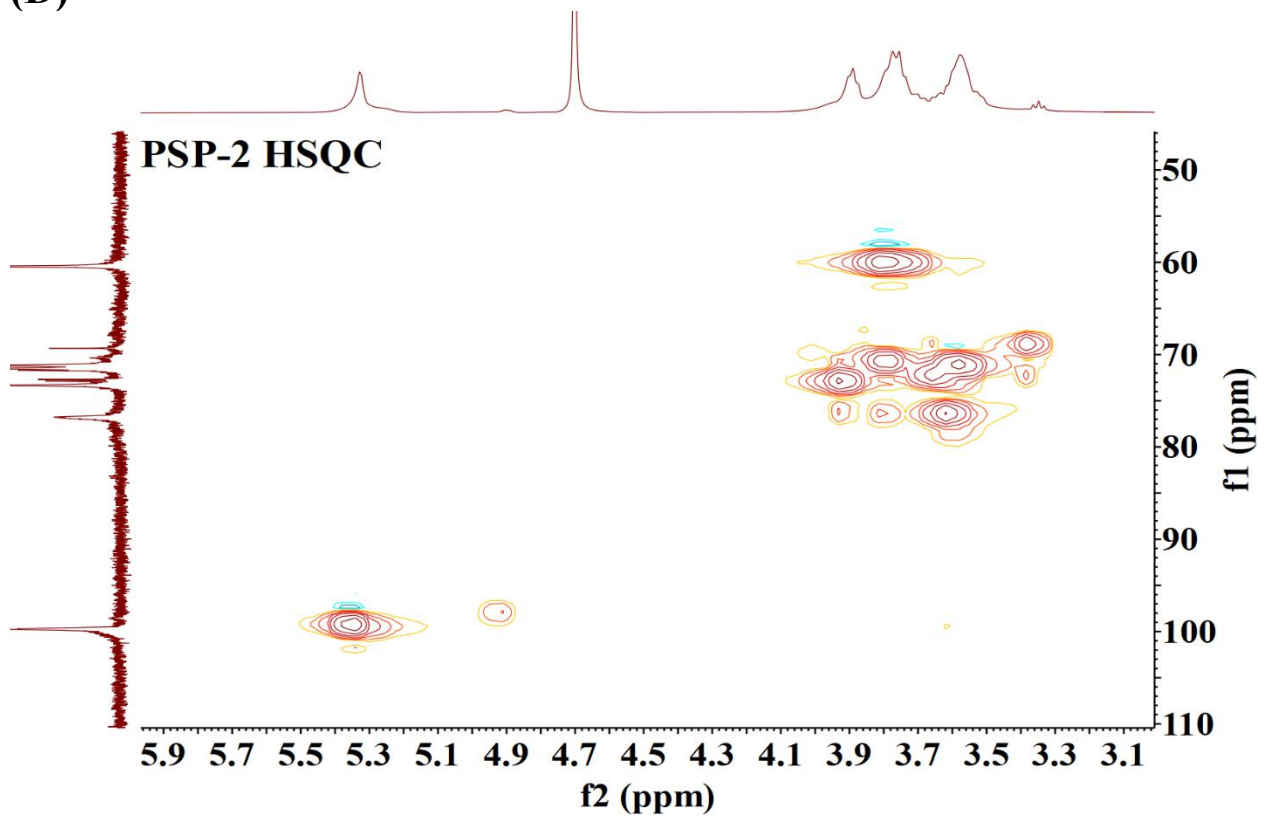

(E)

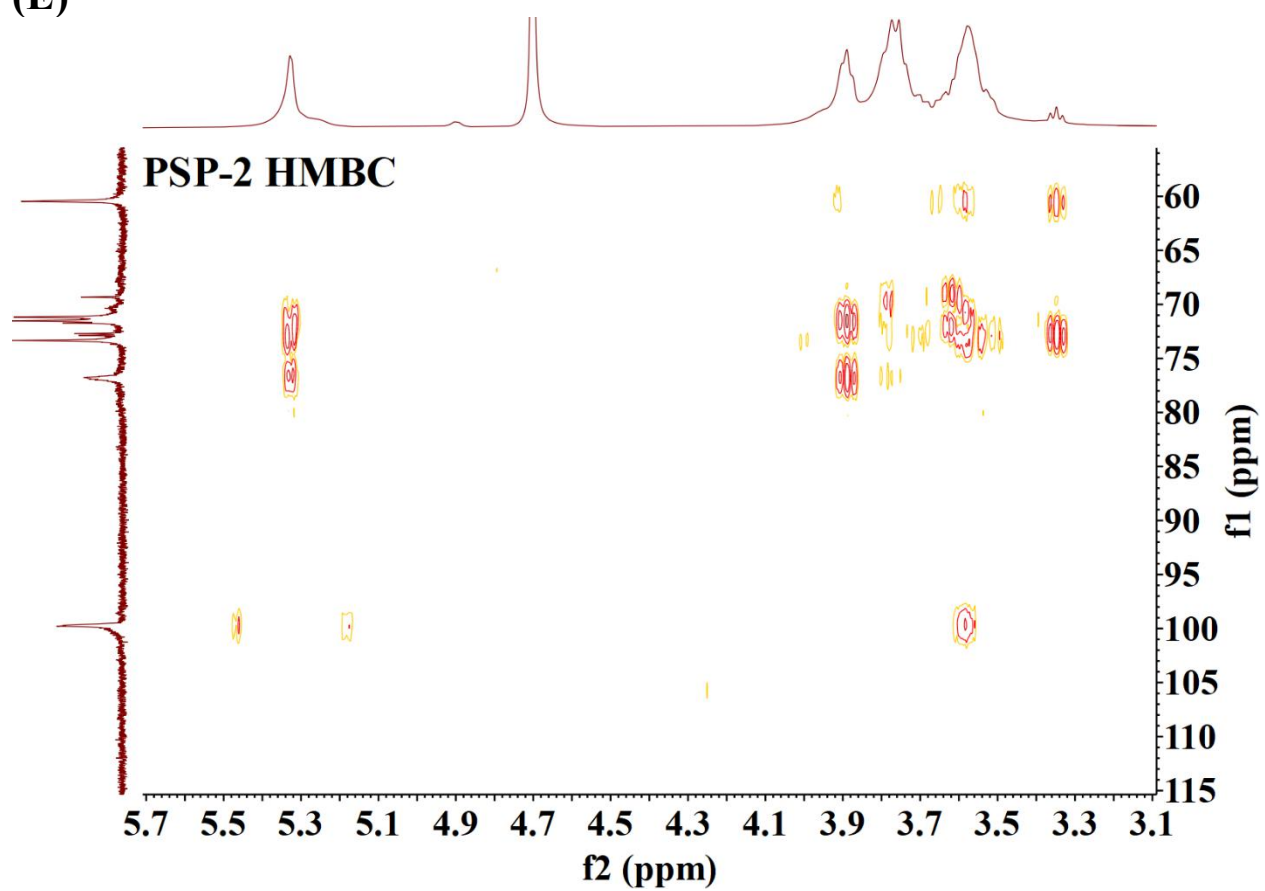

Figure S1.  $^1\text{H}$  spectrum (A);  $^{13}\text{C}$  NMR spectrum (B); COSY spectrum (C); HSQC spectrum (D) and HMBC spectrum (E) of PSP-2.
